# Supplementary material for: Using Twitter to Examine Smoking Behavior and Perceptions of Emerging Tobacco Products
Source: PubMed Central journal article supplement (PMC3758063; doi:10.2196/jmir.2534), 2013-08-29
Supplement: jmir_v15i8e174_app1.pdf [file jmir_v15i8e174_app1.pdf]

## Appendix 1 – Annotation Scheme

---

**GENRE** (assign each tweet to zero or more of these categories)

---

|                                |                                            |                                                                                                                                                                          |
|--------------------------------|--------------------------------------------|--------------------------------------------------------------------------------------------------------------------------------------------------------------------------|
| <b>Experience</b> (first-hand) | Reports a personal use of tobacco          | <i>last week we smoked cigars and pretended to be dragons loool I love big bang theory</i>                                                                               |
| <b>Experience</b> (other)      | Reports someone else's use of tobacco.     | <i>That awkward moment when you see a six year old holding an unlit cigarette about to light that shit. #sadface</i>                                                     |
| <b>Activism</b>                | Alarm or call for change in tobacco policy | <i>This July 4th, celebrate your freedom from @FDATobacco nazis by smoking a fine cigar. (They're trying hard to remove this freedom, folks.)</i>                        |
| <b>Cultural reference</b>      | Song lyric, movie title, etc               | <i>smoked one too many cigarettes, heard one too many lies</i>                                                                                                           |
| <b>Humor</b>                   | Formulaic joke, bumper sticker, etc.       | <i>Pass with care. I chew tobacco.</i>                                                                                                                                   |
| <b>News</b>                    | News item                                  | <i>U.S. tobacco crop up despite dwindling industry <a href="http://t.co/QPB1pYl">http://t.co/QPB1pYl</a></i>                                                             |
| <b>Info/resource</b>           | Factoid or informational resource          | <i>Hazzards of smokeless cigarettes <a href="http://t.co/FR47HiV">http://t.co/FR47HiV</a></i>                                                                            |
| <b>Marketing</b>               | Sale of tobacco product/accessory          | <i>Try our fantastic Tangerine flavored ecigarette eliquid! Get 20% off at checkout with coupon code - twitter <a href="http://t.co/QeCZ3D3">http://t.co/QeCZ3D3</a></i> |
| <b>Opinion</b>                 | Personal opinion related to tobacco.       | <i>@Mahonopoly smoke cigarettes, it only sucks when you die #YOLO</i>                                                                                                    |

---

---

**THEME** (assign each tweet to zero or more of the lowest level categories below)

---

***Risk, starting, & stopping:*** tweets broadly based on whether people should use tobacco

|                        |                                                                                                                                                                  |                                                                                                                           |
|------------------------|------------------------------------------------------------------------------------------------------------------------------------------------------------------|---------------------------------------------------------------------------------------------------------------------------|
| <b>Cessation</b>       | Quit-smoking resources, personal cessation progress, etc                                                                                                         | <i>i needa quit smoking cigarettes dead ass</i>                                                                           |
| <b>Starting</b>        | How people started tobacco usage, desires to start, etc.                                                                                                         | <i>Em just offered me a fag and I said yes. Am I a smoker now? #peerpressure naughtyyy</i>                                |
| <b>Health</b>          | Direct or indirect reference to health consequences of tobacco usage                                                                                             | <i>Electronic health cigarette<br/><a href="http://t.co/sXyLpvf2">http://t.co/sXyLpvf2</a></i>                            |
| <b>Downplayed risk</b> | Downplayed risk or rationalization of tobacco usage                                                                                                              | <i>cancer is not just caused by cigarettes, but every choice you make in life and then a hint of bad luck</i>             |
| <b>The new tobacco</b> | Activities that are claimed to have taken tobacco's place as addictive or dangerous cultural phenomena, or general reference to tobacco as symbolic of addiction | <i>Facebook is where cigarettes used to be: popular, addictive, and with recognized downsides that most people accept</i> |

***Product:*** tweets centered on tobacco products themselves

|                        |                                                                         |                                                                                                                                   |
|------------------------|-------------------------------------------------------------------------|-----------------------------------------------------------------------------------------------------------------------------------|
| <b>Commodity</b>       | Tobacco products as an item of value; cost; obtaining tobacco products. | <i>#Budget2012 single parents, time to decide, quit smoking or dont feed your kids</i>                                            |
| <b>Connoisseurship</b> | Details of product quality and discrimination; may include brand names  | <i>I'm so god damn tired of getting disgusting menthol cigarettes when I ask someone for one.</i>                                 |
| <b>E-cigarettes</b>    | Reference to electronic cigarettes                                      | <i>Jan. 2010 e-cigarette reviews<br/><a href="http://t.co/am287dRQ">http://t.co/am287dRQ</a></i>                                  |
| <b>Hookah</b>          | Reference to hookah                                                     | <i>#UknowUasianWhen you go to someones house just to do shisha and take pictures with smoke coming out your mouth like a nob.</i> |

***Sociocultural factors:*** role of tobacco in social image and relationships

|                                |                                                                                       |                                                                                                 |
|--------------------------------|---------------------------------------------------------------------------------------|-------------------------------------------------------------------------------------------------|
| <b>Image &amp; stereotypes</b> | social image, user stereotypes, and other social indexicality associated with tobacco | <i>Hood bitches get back shots and smoke black &amp; milds *regular flavor* @ the same time</i> |
| <b>Social relationships</b>    | Effects on family and other social relationships                                      | <i>Sitting in front of a random hotel having sister bonding time while smoking cigars.</i>      |

---

*continued on next page*

---

**THEME** (assign each tweet to zero or more of the lowest level categories below)

---

**Consumption:** details of actual tobacco usage

|                         |                                                                                                |                                                                                                                  |
|-------------------------|------------------------------------------------------------------------------------------------|------------------------------------------------------------------------------------------------------------------|
| <b>Pleasure</b>         | Tobacco usage as a pleasurable activity                                                        | <i>If I was Steve Jobs, I could definitely use a cigarette after the massive blowjob Twitter gave him today.</i> |
| <b>Craving</b>          | Possibly related to stress relief                                                              | <i>omg, i havent had a cigarette in a good 3 days, this is going to be a bad week. fuck me.</i>                  |
| <b>Disgust</b>          | Tobacco users or usage as repulsive                                                            | <i>Ughhhh ! I smell like cigarettes. I also have randm ass texts from last night. Idek.</i>                      |
| <b>Underage usage</b>   | Tobacco usage by minors                                                                        | <i>Beer ponggg / hookah round 2 with my goons waddduppppppp. I love when my parents rnt home!</i>                |
| <b>Other substances</b> | Tobacco in association with other addictive substances such as alcohol, caffeine, or marijuana | <i>cigarettes are only good when im drunk</i>                                                                    |
| <b>Backgrounded</b>     | Everyday or non-foregrounded references to tobacco usage.                                      | <i>Goddamn.. These winds are crazy. Almost blew away just smoking a cigarette.</i>                               |

**Industry & politics:** tweets concerning tobacco industry, regulation, economy, taxation

|                 |                                                         |                                                                                                                                                                                      |
|-----------------|---------------------------------------------------------|--------------------------------------------------------------------------------------------------------------------------------------------------------------------------------------|
| <b>Industry</b> | Tobacco industry-related                                | <i>TIL In 2009, the company Reynolds American (the second-largest tobacco company in the US) closed a deal for \$44.5... <a href="http://t.co/RQ9subQI">http://t.co/RQ9subQI</a></i> |
| <b>Politics</b> | Political aspects including regulation and smoking bans | <i>I would like to thank those involved in writing the budget when it comes to the increase in cigarettes! #filthyhabit #shouldbemorethough</i>                                      |

---

---

**SENTIMENT** (assign each tweet to positive, negative, or neither)

---

|                  |                                   |                                                                                               |
|------------------|-----------------------------------|-----------------------------------------------------------------------------------------------|
| <b>Positive</b>  | Positive sentiment toward tobacco | <i>Smoking that good hookah with the bro Sultan!<br/>#GoodOldDays #brotherforlife</i>         |
| <b>Negative</b>  | Negative sentiment toward tobacco | <i>omg i hate the smell of ciggeretts</i>                                                     |
| <b>[Neither]</b> | Neutral reference to tobacco      | <i>tinarosa7 btw i dont knw why they smoke shisha nbut i knw that its not allowd in islam</i> |

---
